## RESEARCH ARTICLE

# Parental burnout among Somali mothers: Associations with mental health, perceived social support, and sociodemographic factors

Juweria N. L. Abshir<sup>1</sup>, Fatumo Osman<sup>1,2,3</sup>, Gallad Dahir<sup>2</sup>, Anton Dahlberg<sup>3\*</sup>

**1** School of Health and Welfare, Dalarna University, Falun, Sweden, **2** School of Public Health and Research, Somali National University, Mogadishu, Somalia, **3** Child Health and Parenting (CHAP), Department of Public Health and Caring Sciences, Uppsala University, Uppsala, Sweden

\* [anton.dahlberg@uu.se](mailto:anton.dahlberg@uu.se)

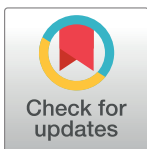

## Abstract

Parenthood can be defined by the contradiction that it is one of the most satisfying yet stressful experiences in life. Many parents experience stress during parenthood, and some to the extent that they display symptoms of parental burnout. Nevertheless, research on parental burnout is scant and many studies have only examined the condition in Western settings. The aim of this study was to examine parental burnout among Somali mothers in Mogadishu, Somalia, and its association with certain psychological, psychosocial, and sociodemographic factors. In this cross-sectional study, questionnaire data were collected through the measurements Parental Burnout Assessment and Patient Health Questionnaire 9, as well as through social and demographic questions. A total of 882 Somali mothers in Mogadishu participated. The analysis methods used were univariate, bivariate, and multiple linear regression analysis. The results revealed that the mean parental burnout score was low in the sample. Additionally, a significant association was found between higher levels of parental burnout and higher levels of depression, perceived lack of social support, being unmarried, having a low monthly household income, and when the youngest child was of school-age.

## OPEN ACCESS

**Citation:** Abshir JNL, Osman F, Dahir G, Dahlberg A (2023) Parental burnout among Somali mothers: Associations with mental health, perceived social support, and sociodemographic factors. PLOS Glob Public Health 3(10): e0002501. <https://doi.org/10.1371/journal.pgph.0002501>

**Editor:** Julia Robinson, PLOS: Public Library of Science, UNITED STATES

**Received:** April 19, 2023

**Accepted:** September 20, 2023

**Published:** October 19, 2023

**Copyright:** © 2023 Abshir et al. This is an open access article distributed under the terms of the [Creative Commons Attribution License](https://creativecommons.org/licenses/by/4.0/), which permits unrestricted use, distribution, and reproduction in any medium, provided the original author and source are credited.

**Data Availability Statement:** In accordance with the ethical approval for the study (SNU/SPHR/005/2021), we are not authorised to make the data publicly available. All relevant data are available upon request and approval from the Senior Registrar Clerk at Dalarna University. Interested researchers may contact Dalarna University ([data-skydd@du.se](mailto:data-skydd@du.se)) or Somali National University ([sphr@snu.edu.so](mailto:sphr@snu.edu.so)), to request the data used for the analyses in this paper.

## Introduction

Parental burnout is a context-specific condition that has its origin in research on job burnout. However, due to its specific nature, the condition has more distinct consequences in the particular sphere of parenting [1]. When defining parental burnout, it is important to separate it from *parenting stress*. Parenting stress is common and even necessary in one's parenting role. However, when the parenting stress persistently and substantially overwhelms the parent's resources to cope, that is when parental burnout occurs [2]. In this respect, parental burnout is, according to Mikolajczak, Gross, and Roskam [3], defined as a state in which the parent experiences intense exhaustion and chronic stress related to their parental role, where the experienced demands surpass the available resources. Parental burnout manifests through four main symptoms, typically displayed through four stages: emotional exhaustion, emotional distancing from one's child(ren), loss of pleasure in the parental role, and contrast with previous parental self. The risk of developing parental burnout has been enhanced over recent years

**Funding:** The authors received no specific funding for this work.

**Competing interests:** The authors have declared that no competing interests exist.

[4]. However, research on parental burnout is still in its infancy, and there is a general lack of research [2].

Parental burnout has shown to impair the parent's ability to perform their parental duties, which has a negative impact on the parent-child relationship. For instance, it can lead parents to exhibit violent- and neglectful behaviour towards their children [2, 4]. Interestingly, parental burnout has shown to greatly affect mothers [5, 6]. Research has, moreover, shown that parental burnout is frequently accompanied by other mental disorders, such as depression and anxiety [7–9], and in some cases, the condition might cause mental disorders [5]. There are also indications that parental burnout is associated with lower perceptions of social support [8] and partner parental support [10]. In addition, the correlation between parental burnout and different socio-demographic factors is yet to be fully understood [11]. Recent studies on parental burnout have identified some sociodemographic factors (e.g., financial situation and the age of the youngest child) which may either act as risk- or protective factors [11–13]. Other associated factors are being a woman, being a young mother, being a single parent, or having many children [14]. Other research indicates that sociodemographic factors are less predictive of parental burnout [15–17]. However, recent research concludes that being a mother is a risk factor for parental burnout, and mothers are more vulnerable to this condition in contrast to fathers [5, 6, 18, 19]. Moreover, parental burnout has mainly been examined among parents in high-income and Western settings, while parents in other contexts, especially in Sub-Saharan settings, have been neglected in the discourse and research on parental burnout [19]. This has resulted in low scientific understanding of the condition in a non-Western setting. Additionally, the geographical aspect should be considered when examining parental burnout, as it can affect the score and which factors are associated with the condition. Parenting in African countries usually occurs in a collectivistic culture, which is characterised by a high level of interdependence where interconnectedness is essential. This means that the parental responsibility does not merely fall on the parents [19]. Instead, older siblings, relatives, and neighbours have a responsibility towards the child, which usually is to have an educational role by transmitting values, good morals, and skills to the child. In this regard, the parental role is shared with others and not only confined to the parent in collectivistic cultures. However, despite the differences in parenting arrangements in certain African countries, when compared with other countries, very little research has been conducted from this context on parental burnout. This becomes concerning, since despite the role-sharing arrangement, the difficult socio-economic conditions and social problems in many African countries can still make it difficult and stressful for parents to fulfil their parental duties [19].

Thus, in this study, the attention will be turned towards mothers in Mogadishu, Somalia, since little is known about parental burnout among mothers in this context. From a scientific perspective, Mogadishu becomes an interesting setting to examine parental burnout, since the city struggles with many social problems, such as maternal mortality and indiscriminate attacks, which leaves families vulnerable [20, 21]. Therefore, with this chosen setting, this study can help fill the existing research gap on parental burnout.

## Aim

This study aims to examine parental burnout among Somali mothers in Mogadishu, Somalia, and its association with certain psychological, psychosocial, and sociodemographic factors.

## Methods

### Participants

The data collection took place between August and September 2021, as part of a larger research project, in which the present study was one part. Participants were recruited from nine

government-owned Maternity and Child Health centres (MCHs) in Mogadishu, Somalia with the help of four experienced Somali speaking data collectors and one of the co-authors (GD). The data collectors' tasks were to make the questionnaire available to the participants and help them with reading the questions and marking their responses due to low literacy levels. Two of the co-authors (FO, GD) were supervising the data collectors, through daily contact, providing feedback and helping when challenges arose. Lastly, the supervisor accompanied the data collectors to ensure that the data was collected ethically.

In total, data were collected between August and September 2021 from 900 Somali women who visited any of the nine MHCs. As only mothers were of interest in this study, eighteen responses from soon-to-be mothers were excluded, resulting in a sample of 882 mothers. Information on the study was given written and verbally to mothers who were waiting to receive care or received care. Only the mothers who gave written consent—or verbal when not able to read or write—participated in the study. To prevent individual participants from the risk of being identified in the dataset, all collected data were anonymous. Ethical approval for this study was obtained by the Somali National University, School of Public Health (SNU/SPHR/005/2021) and permission was also sought at district and health facility level.

### Inclusivity in global research

Additional information regarding the ethical, cultural, and scientific considerations specific to inclusivity in global research is included in the Supporting Information ([S1 Checklist](#)).

### Instruments

The data used in this study were collected using a digital self-reported questionnaire in Somali. Questionnaires were answered digitally through designated mobile phones, using the data collection program KoboToolbox. Before the data collection was conducted, the questionnaire was pilot tested on eight Somali mothers in Mogadishu. During the pilot testing, it was observed that the mothers occasionally found the questions in the Parental Burnout Assessment (PBA) measurement to be strange and would ask the data collector how a mother could feel negatively towards her children.

**Parental Burnout Assessment, PBA.** The PBA consists of 23 questions that are divided into four symptom dimensions of parental burnout. The first dimension is *Emotional exhaustion*, which consists of nine questions such as “I feel completely run down by my role as a parent”. The next dimension is *Contrast with the previous parental self*, which consists of six questions such as “I am ashamed of the parent that I have become”. The third dimension is *Loss of pleasure in the parental role*, which consists of five questions such as “I do not enjoy being with my child(ren)”. The fourth dimension is *Emotional distancing from one's child(ren)*, which consists of three questions such as “I am no longer able to show my child(ren) how much I love them”. The questionnaire was answered using a seven-point frequency scale from zero to six (0 = never, 6 = daily). Since the participants in this study consisted of Somali mothers, the questions were translated to Somali by following the fourth steps according to World Health Organizations' process of translation [22]. The PBA was first translated into Somali by the second author and checked for errors by the third author. Subsequently, a research member fluent in both English and Somali performed the back translation. The back translation was then discussed with the reference group, who agreed to pilot test the measure on the target population. During the pilot testing, it was observed that some mothers occasionally found the questions in the PBA measurement to be unusual and would inquire of the data collector how a mother could feel negatively towards her children.

Internal consistency was assessed for the study sample, providing high alpha-values overall (Full scale  $\alpha = .95$ ; Exhaustion  $\alpha = .89$ ; Contrast in parental self  $\alpha = .89$ ; Feelings of being fed up  $\alpha = .91$ ; Emotional distancing  $\alpha = .32$ ). The Emotional distancing subscale alone showed low internal consistency. An inspection of the subscale revealed specifically low correlations for the item "I do what I'm supposed to do for my child(ren), but nothing more". With this item removed, the subscale  $\alpha$  increased to  $.73$ . For this study, only the Full scale (PBA total score) with all items included was used.

**Patient Health Questionnaire, PHQ-9.** To assess the level of depression among the participants in this study the PHQ-9 was used, as it has shown to be applicable in different contexts around the globe [23, 24]. The PHQ-9 is a short self-assessment questionnaire used for screening for major depressive disorder and assessing the current level of depressive symptoms [23]. The PHQ-9 has been translated into different languages and has shown great validity when tested. In 2016, a Somali version of the PHQ-9 was assessed psychometrically by Nallusamy and colleagues [24], and showed to have strong internal consistency, homogeneity, and reliability.

**Perceived social support and support from husband.** In this study, social support was assessed based on the mothers' perceptions of being cared for by others and having a trusted network to rely on. Additionally, the study examined the mothers' views on support from their husbands. The questions included access to help and support from family, relatives, friends, or others when needed, partner parental support, specifically the perceived support received from the mothers' husbands.

## Data analysis

All analyses were carried out using SPSS and R. Multicollinearity among independent variables was assessed using Pearson's correlations and Spearman's rank correlations. Correlation coefficients above  $.70$  were excluded from further analyses, to avoid multi-collinearity within the regression model. Age and number of children had a correlation  $>.70$  and subsequently age was excluded from the regression analyses. This, since the variable number of children was proven to be of higher scientific interest based on previous research [12, 13, 19]. No other variables reached the threshold and were thus kept in the regression analysis. Associations between PBA scores and independent variables were analysed through multiple linear regression.

## Results

For a breakdown of sociodemographic variables in the sample, please see [Table 1](#). The majority of the Somali mothers in this study were married (95.4%), which resulted in a small variety in marital status. Interestingly, when examining the monthly household income, the variable was mostly divided into two categories where the majority of the mothers either had a monthly income of less than 100 USD (41.8%) or around 100 USD (48.8%). Furthermore, the mean age of the mothers was around 28 years. Lastly, the mean level in the PHQ-9 was 4, which indicated a low level of depression among the mothers. Nonetheless, differences in individual responses have been distinguished, which showed that the depression scores ranged from 0 to 21. This suggested that there were differences in the degree of depression among the individual participants in this study, while the overall level of depression remained low.

### The relation between PBA, depression, social support and sociodemographic factors

The results from the regression analysis ([Table 2](#)) indicated an overall explained variance of 23% by the variables in the regression model (Adjusted  $R^2 = .231$ ,  $F(7,867) = 38.557$ ,  $p <$

**Table 1. Sociodemographic variables (n = 882).**

| Variables                             | n           | %    | Min-Max |
|---------------------------------------|-------------|------|---------|
| Marital status                        |             |      |         |
| Married                               | 841         | 95.4 |         |
| Not married                           | 41          | 4.6  |         |
| Monthly household income              |             |      |         |
| Less than 100 USD                     | 369         | 41.8 |         |
| 100 USD                               | 430         | 48.8 |         |
| 200 USD                               | 79          | 9    |         |
| 300 USD or more                       | 4           | 0.5  |         |
| Perceived social support <sup>a</sup> |             |      |         |
| Yes                                   | 704         | 79.8 |         |
| No                                    | 178         | 20.2 |         |
| Support from husband                  |             |      |         |
| A lot                                 | 448         | 50.8 |         |
| Some                                  | 344         | 39   |         |
| Little                                | 75          | 8.5  |         |
| Never                                 | 15          | 1.7  |         |
| Mother's age M (SD)                   | 28.25 (6.4) |      | 15–60   |
| Number of children M (SD)             | 4.61 (2.5)  |      | 1–16    |
| Age of the youngest child M (SD)      | 1 (1.4)     |      | 0–10    |
| PHQ-9 <sup>b</sup> total score M (SD) | 4 (5.1)     |      | 0–21    |
| PBA <sup>c</sup> total score M (SD)   | 6 (12.8)    |      | 0–95    |

<sup>a</sup> Question: “Do you have family, relatives, friends, or others who can give you help and support when needed?”

<sup>b</sup> Patient Health Questionnaire-9 (Depression)

<sup>c</sup> Parental Burnout Assessment

<https://doi.org/10.1371/journal.pgph.0002501.t001>

.001). Neither number of children nor support from the husband were statistically significant predictors of parental burnout ( $p < .05$ ). Parental burnout was significantly associated with depression and perceived social support, where higher levels of depression were correlated with higher levels of parental burnout. Low perception of social support significantly predicted higher PBA scores. Further, being unmarried was associated with higher PBA scores, as well as

**Table 2. Regression model for PBA<sup>a</sup> total score.**

|                                   | Standardised $\beta$ | t      | p-value |
|-----------------------------------|----------------------|--------|---------|
| (Constant)                        |                      | 8.862  | < .001  |
| Marital status <sup>b</sup>       | -.167                | -5.523 | < .001  |
| Number of children                | -.052                | -1.671 | .095    |
| PHQ9 <sup>c</sup> Total score     | .278                 | 7.018  | < .001  |
| Age of the youngest child         | .090                 | 2.899  | .004    |
| Perceived social support          | -.287                | -9.204 | < .001  |
| Monthly Household income          | -.074                | -2.312 | .021    |
| Support from husband <sup>d</sup> | .028                 | .717   | .474    |

<sup>a</sup> Parental Burnout Assessment

<sup>b</sup> Reference category: *not married*

<sup>c</sup> Patient Health Questionnaire-9 (Depression)

<sup>d</sup> Scaled high to low

<https://doi.org/10.1371/journal.pgph.0002501.t002>

having older children. Lastly, lower monthly household income was associated with higher PBA scores.

## Discussion

The results of this study demonstrated that the overall level of parental burnout among Somali mothers in Somalia was low. In addition, certain factors were associated with the condition (i.e., marital status, household income, the age of the youngest child, depression, and perceived social support). This study was the first to examine parental burnout among mothers in Somalia, as such it constitutes an important extension of previous research. From previous studies it has been shown that the score of the condition varies [25]. By comparing the findings from this study with previous research, the score of parental burnout among Somali mothers is lower. And much like the results from this study, other Sub-Saharan countries (e.g., Togo and Cameroon), as well as other countries in the global South (e.g., Thailand and Pakistan) presented a lower mean score in comparison to many other countries [19, 25]. This may from one perspective propose that there are factors in these countries that inhibit the experience of parental burnout, such as parenting cultures [19] and societal values [25]. In African countries, such as Somalia, parenting occurs in a collectivistic culture. As a result, the parental responsibility does not merely fall on the parent but is instead shared with relatives and others in their network [25]. Therefore, it can be hypothesised that sharing the parental responsibilities and tasks with others may be an important resource that has contributed to the low parental burnout among this sample. From another perspective, there may be differences in methodological aspects that contribute to the lower mean scores, such as the population size and the chosen target group in this study, along with the questionnaire used.

There have been scientific uncertainties concerning the correlation between sociodemographic factors and parental burnout [13, 15]. Some studies have concluded that being unmarried [14, 26] and having a lower monthly household income [13] are correlated with higher levels of parental burnout. These results dovetail with the findings from this study. Thus, this may indicate that even in a Somali context, these factors remain important in understanding parental burnout. Interestingly, previous studies have concluded that having a child under five years of age were associated with higher levels of parental burnout [11]. However, this study showed that the level of parental burnout among Somali mothers increased with the child's age. One possible explanation may be found in how the environmental context can affect the parenting experience, as suggested by Bornstein [27]. In the city of Mogadishu, where civil unrest and terrorist attacks are common, there is a greater responsibility and pressure to raise a child in a safe and nurturing environment [20]. Thus, mothers whose youngest child is of school-age may possibly be faced with more pressure and demands in their parental role due to the child having to leave the house. Thus, the findings from this study become an interesting aspect to consider and may provide a new perspective on the condition. In addition, much like previous research [8, 13], this study demonstrated that parental burnout was significantly correlated with depression. Due to this study being the first to examine this correlation in a post-conflict and Sub-Saharan setting, it may therefore widen the understanding of the condition in other settings, along with stressing the importance of examining other psychological factors to the condition. Interestingly, and in contrast to previous studies, the findings from this study indicated that partner parental support did not significantly correlate with parental burnout. This may be due to how the mother's role as the primary caregiver who is independently responsible for various domestic duties is widely adopted and accepted [5]. Thus, the support from their husband may not be regarded as an important resource for the mothers. Lastly, since this study is the first to examine the correlation between the condition and perceived



social support in a Sub-Saharan context and among a wider population, it constitutes an important extension of research on parental burnout. Moreover, the results from this study dovetail with the only other study [28] examining the correlation between the condition and perceived social support. Thus, this highlights the importance of examining this phenomenon further to create a more grounded knowledgebase. Our findings underscore the importance of providing parenting support for parents who are at risk of experiencing parental burnout or have already indicated symptoms of parental burnout. Therefore, the focus should be on implementing preventive interventions and screening parents during antenatal care.

### Limitations and strengths

While the present study has the merit of providing a broader knowledge base, it is not without limitations. From a methodological point, it is important to note that the PBA measure has not been validated in a Somali-speaking sample. However, the possibility of using the PBA measure was tested through a pilot test, which indicated that the measure functioned well and the questions were comprehensive among the pilot participants. Nonetheless, since the measure has not been formally validated, the results from this study must therefore be interpreted with caution. Another possible limitation in this study is related to the social desirability factor and the stigma around mental health in Somalia. Due to the low literacy levels in Somali, reading the questions and the response options became an inevitable and crucial aspect in this study. This may, however, have hindered some mothers from truthfully answering questions regarding mental health in fear of being stigmatised. To the best of our knowledge, however, this is the first study to examine parental burnout in a post-conflict, Sub-Saharan setting and among the most vulnerable group. As such, it provides an important extension of previous research. In addition, even though the sample consisted of only mothers, it still remained both large and heterogeneous. Thus, it provided a larger insight in a bigger and diverse population.

As mentioned in the introduction, there is evidence that other mental conditions, such as anxiety, are related to parental burnout. In the present study, no data on anxiety symptoms or other mental conditions were collected. Hence, the association between parental burnout and other mental conditions apart from depression could not be assessed in this context, which can be seen as a limitation. Further, all data were collected during the Covid-19 pandemic. As different individuals may have responded differently to the outbreak and its direct and indirect effects on everyday life, it is possible that the results would be different in a post-pandemic context. Lastly, with the high response rate in this study it provided both higher data quality and accuracy to this study.

### Supporting information

**S1 Checklist. Inclusivity in global research.**  
(DOCX)

### Acknowledgments

The authors would like to thank all the mothers who participated in this study. We also thank the data collectors, Anisa Nur Hussein, Asha Sidow Ali Nur, Sid Ali Hassan Ali, Sawda Abdinour Ibrahim for their important work in the data collection, and Somali National University for facilitating this study.

### Author Contributions

**Conceptualization:** Juweria N. L. Abshir, Fatumo Osman, Gallad Dahir, Anton Dahlberg.

**Data curation:** Fatumo Osman.

**Formal analysis:** Juweria N. L. Abshir.

**Investigation:** Anton Dahlberg.

**Methodology:** Juweria N. L. Abshir, Fatumo Osman, Anton Dahlberg.

**Project administration:** Fatumo Osman, Gallad Dahir.

**Software:** Anton Dahlberg.

**Supervision:** Fatumo Osman, Anton Dahlberg.

**Writing – original draft:** Juweria N. L. Abshir, Fatumo Osman, Anton Dahlberg.

**Writing – review & editing:** Juweria N. L. Abshir, Fatumo Osman, Gallad Dahir, Anton Dahlberg.

## References

1. Mikolajczak M, Gross JJ, Stinglhamber F, Lindahl Norberg A, Roskam I. Is parental burnout distinct from job burnout and depressive symptoms? *Clinical Psychological Science*. 2020; 8(4):673–89.
2. Mikolajczak M, Roskam I. Parental burnout: Moving the focus from children to parents. *New directions for child and adolescent development*. 2020; 2020(174):7–13. <https://doi.org/10.1002/cad.20376> PMID: 33084244
3. Mikolajczak M, Gross JJ, Roskam I. Parental burnout: What is it, and why does it matter? *Clinical Psychological Science*. 2019; 7(6):1319–29.
4. Sorkkila M, Aunola K. Resilience and parental burnout among Finnish parents during the COVID-19 pandemic: variable and person-oriented approaches. *The Family Journal*. 2022; 30(2):139–47. <https://doi.org/10.1177/10664807211027307> PMID: 35399756
5. Roskam I, Mikolajczak M. Gender differences in the nature, antecedents and consequences of parental burnout. *Sex Roles*. 2020; 83(7):485–98.
6. Sánchez-Rodríguez R, Orsini É, Laflaquière E, Callahan S, Séjourné N. Depression, anxiety, and guilt in mothers with burnout of preschool and school-aged children: Insight from a cluster analysis. *Journal of affective disorders*. 2019; 259:244–50. <https://doi.org/10.1016/j.jad.2019.08.031> PMID: 31446386
7. Kerr ML, Rasmussen HF, Fanning KA, Braaten SM. Parenting during COVID-19: a study of parents' experiences across gender and income levels. *Family Relations*. 2021; 70(5):1327–42. <https://doi.org/10.1111/fare.12571> PMID: 34548726
8. Kütük MÖ, Tufan AE, Kılıçaslan F, Güler G, Çelik F, Altıntaş E, et al. High depression symptoms and burnout levels among parents of children with autism spectrum disorders: a multi-center, cross-sectional, case–control study. *J Autism Dev Disord*. 2021; 51(11):4086–99. <https://doi.org/10.1007/s10803-021-04874-4> PMID: 33459915
9. Lindström C, Åman J, Norberg AL. Parental burnout in relation to sociodemographic, psychosocial and personality factors as well as disease duration and glycaemic control in children with Type 1 diabetes mellitus. *Acta Paedr*. 2011; 100(7):1011–7. <https://doi.org/10.1111/j.1651-2227.2011.02198.x> PMID: 21414025
10. Gillis A, Roskam I. Daily exhaustion and support in parenting: Impact on the quality of the parent–child relationship. *Journal of Child and Family Studies*. 2019; 28(7):2007–16.
11. Vigouroux SL, Scola C. Differences in parental burnout: Influence of demographic factors and personality of parents and children. *Front Psychol*. 2018; 9:887. <https://doi.org/10.3389/fpsyg.2018.00887> PMID: 30013491
12. Kawamoto T, Furutani K, Alimardani M. Preliminary Validation of Japanese Version of the Parental Burnout Inventory and Its Relationship With Perfectionism. *Front Psychol*. 2018;9. <https://doi.org/10.3389/fpsyg.2018.00970> PMID: 29973893
13. Lebert-Charron A, Dorard G, Wendland J, Boujut E. Who are and are not the burnout moms? A cluster analysis study of French-speaking mothers. *Journal of Affective Disorders Reports*. 2021; 4:100091. <https://doi.org/10.1016/j.jadr.2021.100091>



14. Roskam I, Raes M-E, Mikolajczak M. Exhausted parents: Development and preliminary validation of the parental burnout inventory. *Front Psychol.* 2017;163. <https://doi.org/10.3389/fpsyg.2017.00163> PMID: 28232811
15. James MEBIR, Grossb J, Kapala AFF, Gérard F, Mikolajczaka M. Treating parental burnout: Impact of two treatment modalities on burnout symptoms, emotions, hair cortisol, and parental neglect and violence. *Balance.* 2020; 28(70.31):0.91.
16. Lindahl Norberg A, Forinder U. Different aspects of psychological ill health in a National Sample of Swedish Parents after successful paediatric stem cell transplantation. *Pediatric Blood & Cancer.* 2016; 63(6):1065–9.
17. Mrosová S, Reřovská M, Schlosserová A. Burnout in parents of sick children and its risk factors: a literature review. *Central European Journal of Nursing and Midwifery.* 2020; 11(4):196–206.
18. Lindahl Norberg A, Mellgren K, Winiarski J, Forinder U. Relationship between problems related to child late effects and parent burnout after pediatric hematopoietic stem cell transplantation. *Pediatric transplantation.* 2014; 18(3):302–9. <https://doi.org/10.1111/ptr.12228> PMID: 24483231
19. Sodi T, Kpassagou LB, Hatta O, Ndayizigiye A, Ndayipfukamiye J-M, Tenkué JN, et al. Parenting and parental burnout in Africa. *New Directions for Child and Adolescent Development.* 2020; 2020(174):101–17. <https://doi.org/10.1002/cad.20386> PMID: 33206468
20. Federal Government of Somalia. The Somali Health and Demographic Survey 2020. Somalia: 2020.
21. Central Intelligence Agency. Somalia 2022 [cited 2022 December 7]. Available from: <https://www.cia.gov/the-world-factbook/countries/somalia/>.
22. World Health Organization. Process of translation and adaptation of instruments. 2009.
23. Gold KJ, Spangenberg K, Wobil P, Schwenk TL. Depression and risk factors for depression among mothers of sick infants in Kumasi, Ghana. *International Journal of Gynecology & Obstetrics.* 2013; 120(3):228–31. <https://doi.org/10.1016/j.ijgo.2012.09.016> PMID: 23228821
24. Nallusamy V, Afgarshe M, Shlosser H. Reliability and validity of Somali version of the PHQ-9 in primary care practice. *The International Journal of Psychiatry in Medicine.* 2016; 51(6):508–20. <https://doi.org/10.1177/0091217417696732> PMID: 28629295
25. Roskam I, Aguiar J, Akgun E, Arikan G, Artavia M, Avalosse H, et al. Parental burnout around the globe: A 42-country study. *Affective Science.* 2021; 2(1):58–79. <https://doi.org/10.1007/s42761-020-00028-4> PMID: 33758826
26. Mikolajczak M, Roskam I. A Theoretical and Clinical Framework for Parental Burnout: The Balance Between Risks and Resources (BR2). *Front Psychol.* 2018; 9. <https://doi.org/10.3389/fpsyg.2018.00886> PMID: 29946278
27. Bornstein MH. Culture, parenting, and zero-to-threes. *Zero to three.* 2015; 35(4):2. PMID: 29576678
28. Ardic A. Relationship between Parental Burnout Level and Perceived Social Support Levels of Parents of Children with Autism Spectrum Disorder. *International Journal of Educational Methodology.* 2020; 6(3):533–43.
